1     **A cell-autonomous PD-1/PD-L1 circuit promotes tumorigenicity of thyroid cancer cells by**  
2                                   **activating a SHP2/Ras/MAPK signalling cascade**

3  
4     **Federica Liotti<sup>1</sup>, Narender Kumar<sup>1</sup>, Nella Prevede<sup>1,2</sup>, Maria Marotta<sup>3</sup>, Daniela Sorriento<sup>4</sup>,**  
5     **Caterina Ieranò<sup>5</sup>, Andrea Ronchi<sup>6</sup>, Federica Zito Marino<sup>6</sup>, Sonia Moretti<sup>7</sup>, Renato Colella<sup>8</sup>,**  
6     **Efiso Puxeddu<sup>7</sup>, Simona Paladino<sup>3</sup>, Yoshihito Kano<sup>9</sup>, Michael Ohh<sup>10</sup>, Stefania Scala<sup>5</sup>, Rosa**  
7                                   **Marina Melillo<sup>1,3</sup>**

8  
9     <sup>1</sup>*Institute of Endocrinology and Experimental Oncology (IEOS), CNR, Naples, Italy;* <sup>2</sup>*Department*  
10    <sup>3</sup>*of Translational Medical Sciences, University of Naples Federico II, Naples, Italy;* <sup>3</sup>*Department of*  
11    <sup>4</sup>*Molecular Medicine and Medical Biotechnology, University of Naples Federico II, Naples, Italy;*  
12    <sup>4</sup>*Department of Advanced Biomedical Sciences, University of Naples Federico II, Naples, Italy;*  
13    <sup>5</sup>*Functional Genomics, Istituto Nazionale Tumori "Fondazione G. Pascale", IRCCS, Naples,*  
14    <sup>6</sup>*Italy.;* <sup>6</sup>*Department of Mental and Physical Health and Preventive Medicine, University of*  
15    <sup>7</sup>*Campania "Luigi Vanvitelli", Naples, Italy;* <sup>7</sup>*Department of Medicine, University of Perugia,*  
16    <sup>8</sup>*Perugia, Italy;* <sup>8</sup>*Department of Experimental Medicine, University of Perugia, Perugia, Italy;*  
17    <sup>9</sup>*Department of Clinical Oncology, Graduate School of Medical and Dental Sciences, Tokyo*  
18    <sup>10</sup>*Medical and Dental University, Tokyo, Japan;* <sup>10</sup>*Department of Laboratory Medicine and*  
19    <sup>10</sup>*Pathobiology, Department of Biochemistry Faculty of Medicine, University of Toronto, Toronto,*  
20    <sup>10</sup>*Canada*

21  
22    **Running title:** Intrinsic PD-1 in thyroid cancer

23  
24    **Address correspondence to:**

25    Rosa Marina Melillo, Dipartimento di Medicina Molecolare e Biotecnologie Mediche, University of  
26    Naples Federico II; Istituto di Endocrinologia ed Oncologia Sperimentale del CNR "G. Salvatore",

27 Via S. Pansini 5, 80131 Naples, Italy. Phone: +39-0817463603; Fax: +39-0817463603; E-mail:

28 [rosmelil@unina.it](mailto:rosmelil@unina.it)

29

30

31 **Abstract**

32 The programmed cell death-1 (PD-1) and its ligands PD-L1 and PD-L2 are immune checkpoints.  
33 Typically, cancer cells express the PD-Ls that bind PD-1 on immune cells, inhibiting their anti-  
34 cancer activity. Recently, PD-1 expression has been found in cancer cells. We analysed expression  
35 and functions of PD-1 in thyroid cancer (TC). Human TC specimens (47%), but not normal thyroids,  
36 displayed PD-1 expression in epithelial cells, which significantly correlated with tumour stage and  
37 lymph-node metastasis. PD-1 overexpression/stimulation promoted TC cell proliferation and  
38 migration in culture. PD-1 recruited the SHP2 phosphatase, potentiated its phosphatase activity thus  
39 enhancing Ras activation by dephosphorylation of inhibitory tyrosine 32 and triggering the MAPK  
40 cascade. PD-1 inhibition decreased, while PD-1 overexpression facilitated, TC cell xenograft  
41 growth by affecting cell proliferation. PD-1 circuit blockade in TC, besides restoring anti-cancer  
42 immunity, could also directly impair TC cell growth by inhibiting the Ras/MAPK pathway.

## 43 **Introduction**

44 Immunotherapy represents the major breakthrough of the last years in the therapy of several cancer  
45 types (*Yang, 2015*). The programmed cell death-ligand 1 and 2 (PD-L1, PD-L2) are immune  
46 checkpoints (IC) important for delivering inhibitory signals to immune cells expressing their  
47 receptor programmed cell death-1 (PD-1) (*Yang, 2015*). This circuit is critical in regulating immune  
48 tolerance in various physiologic and pathologic contexts (*Yang, 2015*). Cancer cells suppress anti-  
49 cancer immune response exploiting the PD-1 circuit (*Rabinovich et al., 2007*). Typically, PD-Ls are  
50 expressed by cancer cells, while PD-1 is expressed by immune cells with anti-cancer potential (i.e.,  
51 T cells, macrophages or natural killer cells) (*Rabinovich et al., 2007*). The inhibition of this circuit  
52 through immune checkpoint inhibitors (ICI) - neutralizing antibodies against PD-1, PD-L1 or PD-  
53 L2 - restores the anti-cancer immune response and displays therapeutic activity in various cancer  
54 types (*McNutt, 2013*).

55 Recently, various tumour types have been found to express also intrinsic PD-1 (i.e.,  
56 melanoma, hepatocarcinoma, lung carcinoma and T-cell lymphomas) (*Kleffel et al., 2015, Li et al.,*  
57 *2017, Du et al., 2018, Zhao et al., 2018*). PD-1 intrinsic signalling promoted tumour growth in  
58 melanoma and hepatocarcinoma through a mammalian target of rapamycin (mTOR)/ribosomal  
59 protein S6 Kinase (S6K1) pathway (*Kleffel et al., 2015, Li et al., 2017*). By contrast, in non-small  
60 cell lung cancer (NSCLC) and in T-cell lymphomas, PD-1 behaved as a tumour suppressor (*Du et*  
61 *al., 2018, Zhao et al., 2018*). These data indicate that PD-1 could exert context-related tumour-  
62 intrinsic functions other than the suppression of immune response, and suggest the need of wider  
63 studies on ICI effects on the entire tumour context.

64 Thyroid carcinoma (TC) is the most frequent endocrine malignancy. Follicular cell-derived  
65 TC includes different histotypes ranging from well differentiated (WDTC) to poorly differentiated  
66 (PDTC) and undifferentiated/anaplastic (ATC) carcinomas. WDTCs include papillary histotype  
67 (PTC), representing the majority of these tumours, and follicular histotype (FTC). WDTCs show an  
68 indolent behaviour and are mainly cured by surgery and <sup>131</sup>I radioiodine (RAI) therapy; only a small

69 percentage of them exhibits recurrence, metastasis and resistance to RAI over time. By contrast,  
70 aggressive forms of TC (PDTC and ATC) represent a clinic challenge displaying a remarkable  
71 chemo- and radio-resistant phenotype from the beginning (*Naoum et al., 2018, Liotti et al., 2019*).  
72 Interestingly, aggressive forms of TC exhibit increased immune checkpoint expression and  
73 inefficient immune infiltrate (*French et al., 2012, Bastman et al., 2016, Giannini et al., 2019, Liotti*  
74 *et al., 2019, Malfitano et al., 2019*), features that are being evaluated for the treatment of the disease  
75 (*Saini et al., 2018, Liotti et al., 2019, Malfitano et al., 2019*).

76 Here, we analysed the PD-1/PD-Ls circuit in TC showing that: i) TC cell lines and TC  
77 human samples express, besides PD-Ls, as already demonstrated (*Cunha et al., 2012, Cunha et al.,*  
78 *2013, Ulisse et al., 2019*), also PD-1 at epithelial level, whose levels correlated with tumour  
79 aggressiveness; ii) intrinsic PD-1 sustains proliferation and migration of TC cells through a  
80 SHP2/Ras/MAPK signalling cascade; iii) PD-1 overexpression promotes, while PD-1 blockade  
81 inhibits, ATC xenograft growth by affecting cancer cell proliferation.

82 Thus, TCs express an intrinsic pro-tumorigenic PD-1 circuit. In TC context, the oncogenic  
83 role of PD-1 is dependent on the activation of the Ras/MAPK cascade. PD-1 blockade may  
84 represent a rational therapeutic choice in aggressive forms of TC for both immune response  
85 reconstitution and direct anti-tumour effects.

## 86 **Results**

### 87 **PD-1 receptor and its ligands are expressed in thyroid carcinoma cells**

88 We evaluated the expression levels of PD-1, PD-L1 and PD-L2 in a panel of human TC cell lines  
89 derived from PTC (BcPAP, TPC-1) or ATC (8505c, CAL62, SW1736, FRO, BHT101, HTH7,  
90 OCUT1) compared to a primary human thyroid cell culture (H-6040). Cytofluorimetric analysis  
91 demonstrated that all the cell lines expressed PD-1 on the plasma membrane, though to a lesser  
92 extent than PD-Ls, and that PD-1 protein levels were higher in cancer compared to normal thyroid  
93 cells (**Figure 1A**). PD-1, PD-L1 and PD-L2 mRNA levels were comparable between normal and  
94 cancerous thyroid cells, suggesting that post-translational mechanisms could be responsible for the  
95 protein increase observed in cancer cells (**Figure Supplement 1**).

96 Immunohistochemical (IHC) staining of whole sections from 34 PTC surgical samples with  
97 anti-PD-1 antibodies showed that PD-1 is expressed in TC cells (**Figure 1B**), but not in normal  
98 thyroid epithelial cells (**not shown**). **Figure 1B** shows a representative PTC case with negative PD-  
99 1 staining (**PTC1**), intense PD-1 staining in the tumour immune infiltrate (**PTC2**), and PD-1  
100 immunoreactivity, cytosolic and/or localized at the plasma membrane, in thyroid cancer epithelial  
101 cells (**PTC3**).

102 PD-1 expression was detectable in epithelial cancerous cells of 47% of tumour samples  
103 (**Table 1**). By analysing clinic-pathologic features of the PTC samples, we found that tumour stage  
104 and lymph-nodal metastasis significantly correlated with PD-1 staining (**Table 1**) in our casistic.

105 These data indicate that TC cells can express PD-1 together with its ligands (*Cunha et al.,*  
106 *2012, Cunha et al., 2013, Ulisse et al., 2019*), and that PD-1 expression correlates with tumour  
107 malignancy.

108

### 109 **PD-1 promotes thyroid carcinoma cell proliferation and motility**

110 We selected 8505c and TPC-1 cells - derived from a human ATC and PTC, respectively - to analyse  
111 the biologic effects of PD-1 enforced expression or of PD-1 stimulation by soluble PD-L1 (sPD-L1

112 - 1 µg/ml). Endogenous PD-1 protein expression levels in these cell lines, together with levels of  
113 PD-1 expression upon transient transfection, is shown in **Figure Supplement 2A**. We demonstrated  
114 that transient PD-1 overexpression (pFLAG PD-1 compared to pFLAG) or PD-1 activation (sPD-  
115 L1 vs untreated - NT) significantly increased DNA synthesis, as assessed by BrdU incorporation  
116 (**Figure Supplement 2A**) in both TC cell lines. Accordingly, cell cycle analysis showed an  
117 increased percentage of cells in S and G2/M phases in PD-1-transfected compared to empty vector-  
118 transfected TC cells (**Figure Supplement 2B**). No effects of PD-1 overexpression/activation were  
119 observed on cell viability (**Figure Supplement 2C**). In order to confirm these observations, we  
120 evaluated the effects of PD-1 inhibition on the same cellular functions. To this aim, PD-1  
121 expression was inhibited by siRNA or Nivolumab (anti-PD-1 moAb) in TPC-1 and 8505c cells.  
122 Both siRNAs targeting PD-1 (siPD-1 vs siCTR - 100 nM; **Figure Supplement 2D**) and Nivolumab  
123 (10 µg/ml) (Nivo vs IgG<sub>4</sub>) were able to significantly inhibit BrdU incorporation (**Figure 2B**) and  
124 cell cycle progression (**Figure Supplement 2E**) of TC cells in comparison to the relative controls,  
125 without affecting cell viability (**Figure Supplement 2F**).

126 To assess the role of endogenous PD-1 ligands in TC cell proliferation, we treated 8505c  
127 cells with blocking anti-PD-L1 or anti-PD-L2 moAb (10 µg/ml) or transiently transfected them with  
128 PD-L1 or PD-L2 expressing vectors. PD-L1 or PD-L2 overexpression increased, while anti-PD-L1  
129 or anti-PD-L2 antibodies inhibited, BrdU incorporation in 8505c cells (**Figure Supplement 2G**).  
130 No effects of PD-L1 or PD-L2 were observed on TC cell viability (**not shown**).

131 Since PD-1 expression levels in human TC samples correlated with lymph-nodal metastasis,  
132 we asked whether PD-1 could also stimulate the motility of TC cells. To this aim, we performed  
133 migration assays on 8505c cells stably overexpressing or not PD-1 [pCMV3 PD-1 c113 and c116  
134 compared to pCMV3 empty vector-transfected cells (**Figure Supplement 3A**)] or on parental  
135 8505c cells treated or not with sPD-L1 (1 µg/ml) in the presence or absence of Nivolumab (10  
136 µg/ml) (**Figure 2C**). PD-1 overexpressing TC cells showed increased migratory potential compared

137 to control cells. Consistently, sPD-L1 induced, and Nivolumab inhibited, both basal and sPD-L1-  
138 induced migration (**Figure 2C**).

139 These data indicate that PD-1 intrinsic circuit sustains TC cell proliferation and migration.

140

#### 141 **PD-1 activates the Ras/MAPK signalling cascade in thyroid carcinoma cells**

142 We then asked which signalling pathway was stimulated upon PD-1 overexpression/activation. To  
143 this aim, we used specific phospho-antibodies against various signalling proteins. We found that  
144 BRAF, MEK and MAPK (p44/p42) are activated, as demonstrated by increased levels of their  
145 phosphorylated forms, upon PD-1 transient transfection (**Figure 3A**), PD-1 stable transfection  
146 (**Figure Supplement 3B**), and sPD-L1 treatment (**Figure 3B**) in both 8505c and TPC-1 cells. No  
147 significant activation of other signalling proteins was detected (**Figure Supplement 3C**). To  
148 confirm these observations, BRAF, MEK1/2 and MAPK activation levels were evaluated upon PD-  
149 1 blockade by siPD-1 or Nivolumab treatment. Consistently, both siPD-1 (100 nM) and Nivolumab  
150 (10 µg/ml – 15 and 30 min) reduced the levels of phosphorylated BRAF, MEK1/2 and MAPK  
151 compared to the relative controls (**Figure 3C**) in TC cells.

152 Since the BRAF/MEK/MAPK signalling is potentiated by PD-1 in TC cells, and Ras  
153 GTPase is the main upstream activator of this cascade (*Knauf and Fagin, 2009*), we asked whether  
154 PD-1 could activate Ras. To this end, we used a pull-down assay with the GST-RAF1-Ras binding  
155 domain (RBD), which specifically binds the GTP-loaded active form of Ras. 8505c and TPC-1 cells  
156 were transiently transfected with empty vector (pFLAG) or PD-1 (pFLAG PD-1) in combination  
157 with pCEFL H-Ras AU5 or the relative empty vector (pCEFL). PD-1 enforced expression increased  
158 Ras activation, as assessed by Ras pull-down, in comparison to control (**Figure 3D**), suggesting that  
159 PD-1 potentiates Ras activation in TC cells.

160

#### 161 **PD-1 recruits and activates the SHP2 phosphatase in thyroid carcinoma cells**



162 In immune cells, PD-1 signalling requires the tyrosine phosphatase SHP2 (PTPN11) (*Bunda et al.*,  
163 2015). Upon phosphorylation of tyrosine residues in its cytosolic domain, PD-1 binds to the SH2  
164 domains of SHP2 that, in turn, dephosphorylates signalling components of the immune receptors,  
165 thus down-regulating the immune responses (*Rota et al.*, 2018). In cancer cells, SHP2 acts as a  
166 signalling molecule downstream receptor tyrosine kinases (RTKs), displaying oncogenic activity  
167 (*Zhang et al.*, 2015). In particular, SHP2 can contribute to Ras activation either by recruiting the  
168 GRB2/SOS complex to the plasma membrane (*Ran et al.*, 2016) or through its phosphatase activity  
169 on Ras inhibitory tyrosine residues (*Matozaki et al.*, 2009, *Ran et al.*, 2016).

170 We first asked whether PD-1 could physically interact with SHP2 in TC cells. Reciprocal  
171 co-immunoprecipitation experiments showed that endogenous and exogenously expressed PD-1  
172 bind SHP2 in 8505c and TPC-1 cells (**Figure 4A**). Moreover, pull-down assays with N- or C-  
173 terminal SH2 domain of SHP2 demonstrated that SHP2 can bind PD-1 mainly through SHP2 C-  
174 terminal SH2 domain (**Figure 4B**). In support of these observations, we found that both endogenous  
175 and exogenous PD-1 are tyrosine phosphorylated in TC cells (**Figure Supplement 4A**), condition  
176 necessary to allow the SH2 domains of SHP2 to bind PD-1 (*Ran et al.*, 2016).

177 Cell fractionation of 8505c cells transiently or stably transfected with PD-1 was used to  
178 demonstrate that PD-1 binding to SHP2 enforced the membrane localization of SHP2. Subcellular  
179 fractions of membranes (M) or cytosol (C) were obtained from PD-1 overexpressing and from  
180 control cells (pFLAG-PD-1 vs pFLAG or pCMV3 PD-1 cl 16 vs pCMV3). Enrichment of SHP2  
181 levels in the membrane fractions was observed in PD-1 overexpressing cells compared to empty-  
182 vector transfected cells. Normalizations of each extract were obtained by using antibodies to  
183 transferrin receptor for membrane fraction and  $\alpha$ -tubulin for cytosolic extract (**Figure 4C**). In  
184 agreement with these observations, immunofluorescence (IF) assay of PD-1 overexpressing TC  
185 cells showed a significant increase of SHP2 staining at the plasma membrane in cells  
186 overexpressing PD-1 compared to controls (**Figure 4D and Figure Supplement 4B**).

187 Furthermore, in 8505c cells transfected with PD-1-GFP, we demonstrated by IF that SHP2  
188 and PD-1-GFP co-localize at the plasma membrane (**Figure Supplement 4C**).

189

### 190 **SHP2 dephosphorylates and activates Ras in TC cells**

191 We then searched for the molecular mechanism of Ras activation mediated by the PD-1/SHP2  
192 complex. We first asked whether PD-1 could enhance GRB2 recruitment by SHP2. To this aim, we  
193 used pull-down assays with GST-SH2-GRB2 fusion proteins and co-immunoprecipitation assays  
194 showing no increased GRB2 binding to SHP2 in PD-1 transfected TC cells compared to controls  
195 (**Figure Supplement 4D**). In accordance with these observations, PD-1 enforced expression did not  
196 significantly increase SHP2 tyrosine phosphorylation levels (**Figure Supplement 4A**), on which  
197 GRB2 binding to SHP2 is dependent, nor changed substantially GRB2 compartmentalization as  
198 demonstrated in cell fractionation experiments (**Figure 4C**).

199 Since the GRB2/SOS complex is not involved in PD-1-mediated Ras activation, we asked  
200 whether Ras could be activated by SHP2 through the dephosphorylation of its inhibitory tyrosine  
201 residues (*Bunda et al., 2015, Kano et al., 2016*). We evaluated the phosphatase activity of SHP2 and,  
202 in parallel, the levels of Ras tyrosine phosphorylation in cells overexpressing or not PD-1. We used  
203 a specific SHP2 phosphorylated substrate in the presence of the Malachite Green tracer, a  
204 colorimetric method for the detection of free inorganic phosphate (*Bunda et al., 2015*). We  
205 observed that SHP2 phosphatase activity was significantly increased in PD-1- versus empty-vector-  
206 transfected TC cells (**Figure 4E**). Similar results were obtained in PD-1 stably transfected cells (**not**  
207 **shown**). Consistently with the increased phosphatase activity of SHP2, Ras total phosphorylation  
208 levels, in the presence of PD-1, were significantly reduced in TC cells transfected with pCEFL H-  
209 Ras AU5 (**Figure Supplement 4E**). To assess whether Ras dephosphorylation occurs in its  
210 inhibitory residues 32 and/or 64 (*Bunda et al., 2015*), we used (pan)Ras immunoprecipitation  
211 followed by immunoblotting with anti-phospho Y32 (Ras) or Y64 (Ras) antibodies. These  
212 experiments demonstrated that PD-1 enforced expression in 8505c cells reduced the Ras

213 phosphorylation levels in the inhibitory tyrosine residues 32 in pCEFL Ras AU5-transfected cells  
214 compared to controls (**Figure 4F**). Similar results were obtained in TPC-1 cells (**not shown**). No  
215 differences in phosphorylation levels of inhibitory residues 64 were observed (**not shown**).

216 Taken together, these data indicate that, in TC cells, PD-1 binds SHP2, which in turn  
217 dephosphorylates Ras in its inhibitory tyrosine, thus leading to the activation of the MAPK  
218 signalling cascade.

219

## 220 **PD-1-induced biologic activities in thyroid cancer cells require the SHP2/BRAF/MEK** 221 **signalling proteins**

222 To investigate the role of SHP2 in PD-1 functional activity, we treated TC cells, overexpressing or  
223 not PD-1, with siRNA targeting SHP2 (siSHP2 – 100 nM) or with a SHP2 allosteric inhibitor that  
224 blocks its phosphatase activity (SHP099 – 350 nM) (*Chen et al., 2016*). As shown in **Figure 5A**,  
225 siSHP2 was able to significantly reduce SHP2 protein levels compared to scrambled siRNAs  
226 (siCTR). By BrdU incorporation assays, we demonstrated that siSHP2 significantly decreased DNA  
227 synthesis (**Figure 5B**) in PD-1-, and to a lesser extent in empty vector- transfected, 8505c cells.  
228 Consistently, SHP099 inhibitor significantly reduced PD-1-induced DNA synthesis in 8505c cells  
229 (**Figure 5C**).

230 To investigate the role of the downstream signalling cascade in PD-1 dependent biologic TC  
231 responses, we conducted BrdU incorporation assays in TC cells overexpressing or not PD-1, in the  
232 presence or in the absence of Vemurafenib (Vemu – 10  $\mu$ M) (*Xing et al., 2011*), a BRAF inhibitor,  
233 or Selumetinib (Selu – 10  $\mu$ M) (*Ball et al., 2007*), a MEK inhibitor. As shown in **Figure 5D**, both  
234 drugs were able to significantly revert PD-1-induced DNA synthesis in 8505c cells.

235 Similar experiments were performed to assess the role of the signalling cascade in PD-1-  
236 mediated TC cell migration. **Figure 5E** shows that SHP099 and Vemurafenib, and to a lesser extent  
237 Selumetinib, were able to inhibit the migration of 8505c cells induced by sPD-L1. Similar results  
238 were obtained in TC cells transfected with PD-1 (**not shown**).

239           These data demonstrate that PD-1-induced cell proliferation and motility of TC cells are  
240 dependent on the SHP2/BRAF/MEK pathway.

241

#### 242 **Intrinsic PD-1 signalling enhances xenograft growth of TC cells in immunocompromised mice**

243 To verify whether PD-1 intrinsic signalling and biologic activity could affect tumorigenicity of TC  
244 cells, we xenotransplanted 8505c pCMV3 PD-1 (two clones) and control 8505c pCMV3 (a mass  
245 population) cells in athymic mice. 8505c pCMV3 PD-1 xenografts displayed increased tumour  
246 growth rate that was statistically significant at 4 weeks after injection, in comparison to empty  
247 vector transfected cells (**Figure 6A**). End-stage tumours were excised and analysed for cell  
248 proliferation (Ki-67), apoptotic rate (cleaved-caspase 3) and vessel density (CD31) by  
249 immunohistochemistry. 8505c pCMV3 PD-1 and 8505c pCMV3 xenografts exhibited statistically  
250 significant differences in cell proliferation rate, but not in apoptotic rate or vessel density (**Figure**  
251 **6B** and **Figure Supplement 5A**).

252           To verify whether the inhibition of PD-1 by Nivolumab could affect xenograft growth of  
253 parental 8505c cells, mice were xenotransplanted, randomized in two homogeneous groups, and  
254 administered intraperitoneally (i.p.) with Nivolumab or control IgG<sub>4</sub> (30 mg/kg) twice a week. 5  
255 weeks after xenotransplantation, Nivolumab-treated tumours showed a significant decrease in  
256 growth rate in comparison with the IgG<sub>4</sub>-treated group (**Figure 6C**). Consistently, Nivolumab  
257 significantly reduced TC xenografts' proliferation without affecting apoptotic rate or vessel density  
258 (**Figure 6D** and **Figure Supplement 5B**).

259           Despite these experiments were carried out in immunocompromised mice, we could not  
260 exclude that Nivolumab anti-tumour activity could be ascribed to its ability to affect innate  
261 immunity that is present and functional in athymic mice. Thus, we analysed the density and  
262 activation of immune cells infiltrating 8505c xenografts treated with Nivolumab or with IgG<sub>4</sub> by  
263 cytofluorimetric analysis. We found that Nivolumab treatment did not change the percentage of  
264 CD45<sup>+</sup> leucocytes infiltrating xenografts in comparison to IgG<sub>4</sub> controls, at least at 5 weeks of

265 treatment. Moreover, the density and the expression of polarization/activation markers of tumour-  
266 associated macrophages (TAM), of Ly6C<sup>+</sup> and Ly6G<sup>+</sup> immature myeloid cells, of mature and  
267 immature dendritic cells and of regulatory or activated NK, and NKT cells, were comparable  
268 between Nivolumab- and IgG<sub>4</sub>-treated 8505c xenografts (**Table Supplement 1**).

269           These data indicate that, in our model system, PD-1 blockade by Nivolumab inhibits TC cell  
270 xenograft growth by affecting tumour cell rather than immune cell compartment.

## 271 **Discussion**

272 Several reports point to a promising role of immunotherapy in the treatment of advanced forms  
273 of TCs (*Boutros et al., 2016, Saini et al., 2018*). TCGA analysis of TC provided a classification of  
274 PTC, in spite of their low mutational burden, as “inflamed” tumours and ATC as hot tumours  
275 (*Thorsson et al., 2018*). Interestingly, a profiling of TC confirmed that ATC and PTC are strongly  
276 infiltrated by macrophages and CD8<sup>+</sup> T cells, but that these cells displayed a functionally exhausted  
277 appearance (*Giannini et al., 2019*). In TC, high PD-L1 levels significantly correlated with immune  
278 infiltrate, increased tumour size and multifocality (*Cunha et al., 2012, Cunha et al., 2013*).  
279 Furthermore, the presence of PD-1<sup>+</sup> T lymphocyte infiltrating TC is associated with lymph-nodal  
280 metastasis and recurrence (*French et al., 2012*). Altogether, these data suggest that immune  
281 checkpoint inhibitors (ICI) might represent a promising tool for the treatment of these carcinomas.

282 Our report, for the first time, investigated the expression of the PD-1 receptor in epithelial  
283 thyroid cancer cells, demonstrating that a significant percentage of human TC samples displayed  
284 PD-1 expression on these cells, although at lower levels compared to the expression found on  
285 immune cells infiltrating the tumour. Consistently with the evidence obtained for PD-L1 (*Cunha et*  
286 *al., 2012, Cunha et al., 2013*), our data indicate that PD-1 expression levels correlated with tumour  
287 stage and lymph-nodal metastasis in TC. Accordingly, we demonstrated that PD-1 activity could  
288 induce proliferation and motility of TC cells in culture. This suggests that the PD-1 intrinsic  
289 pathway might have a role in TC cell aggressiveness and invasive ability.

290 The expression of PD-1 on cancer cells, rather than on immune cells, has been observed  
291 recently in melanoma and hepatocellular carcinoma (HCC) (*Kleffel et al., 2015, Li et al., 2017, Yao*  
292 *et al., 2018*). In these cancer types, intrinsic PD-1 activity sustains tumour growth through a  
293 ribosomal mTOR/S6K1 signalling (*Kleffel et al., 2015, Li et al., 2017, Yao et al., 2018*). In TC cells,  
294 similarly to melanoma and HCC, PD-1 intrinsic signalling sustains cancer cell proliferation, but at  
295 variance from these neoplasias, this biologic activity is mediated by the activation of the  
296 Ras/MAPK pathway. Interestingly, mutations causing the activation of the Ras/MAPK signalling

297 pathway are found in >70% of PTC (e.g., *RET/PTC* rearrangements and point mutations of the  
298 *BRAF* and *Ras* genes) and regulate transcription of key genes involved in TC cell proliferation  
299 (*Nikiforov, 2008*). Thus, PD-1 expression could provide a selective advantage to some TC by  
300 enhancing the activation of MAPK pathway, thus promoting proliferation and migratory behaviour  
301 of cancer cells. Interestingly, besides PD-1, also the immune-checkpoint Cytotoxic T lymphocyte-  
302 associated antigen 4 (CTLA-4), classically expressed on leukocytes, has been found to be expressed  
303 and functional on cancer cells (*Contardi et al., 2005, Passariello et al., 2020*).

304 Our data also highlighted the key role of the SHP2 tyrosine-phosphatase in PD-1-mediated  
305 tumorigenic activity of TC cells. Interestingly, SHP2 is recruited by PD-1 in T lymphocytes, and  
306 inhibits immune receptor signalling by dephosphorylating several downstream substrates (*Rota et*  
307 *al., 2018*). In cancer cells, SHP2 has been described to exhibit oncogenic properties (*Zhang et al.,*  
308 *2015, Ran et al., 2016*). SHP2 functions as an adapter that binds various receptor tyrosine kinases  
309 (RTKs) and activates the Ras/MAPK cascade by recruiting the GRB2/SOS complex on the plasma  
310 membrane, thus enhancing SOS-mediated GTP loading on Ras (*Zhang et al., 2015, Ran et al.,*  
311 *2016*). SHP2 has also been described as a direct activator of the Ras GTPase through its ability to  
312 dephosphorylate specific inhibitory tyrosine residues (*Scott et al., 2011, Bunda et al., 2015, Kano et*  
313 *al., 2016*). In our model system, we found that PD-1 binds SHP2, enhancing its membrane  
314 localization and phosphatase activity, thus leading to Ras activation by dephosphorylating  
315 inhibitory tyrosines.

316 Interestingly, increased SHP2 expression was detected in TC samples compared to normal  
317 thyroids correlating with poor tumour differentiation, TNM stage and lymph-nodal metastasis (*Hu*  
318 *et al., 2015*). These evidences suggest that SHP2 may represent a potential target for TC therapy  
319 both alone and in combination with PD-1 targeting.

320 Our observations demonstrate that PD-1 is expressed on TC cells and exerts an intrinsic pro-  
321 tumorigenic function. Defining the functional and biochemical activity of immune checkpoints both  
322 in cancerous cells and in tumour microenvironment of TC will expand our knowledge allowing to

323 develop rational therapeutic strategies for aggressive TC exploiting ICI in combination with SHP2  
324 or kinase inhibitors. In few case reports or in “basket clinical trials” in which ICI [i.e.,  
325 Pembrolizumab (anti-PD-1), Nivolumab (anti-PD-1), or Atezolizumab (anti-PD-L1)] were used  
326 alone or in combination with Multikinase Inhibitors (MKI) for the treatment of advanced and/or  
327 metastatic TC, encouraging preliminary clinic evidence of efficacy has been reported (*Cabanillas et*  
328 *al., 2018, Iyer et al., 2018, Liotti et al., 2019*).

329           The evaluation of PD-1 expression in cancer cells might be important to identify tumours  
330 and/or patients that will be likely to respond to ICI administration by taking advantage of both drug  
331 effects on immune compartment and on cancer cell proliferation.



## 332 **Materials and Methods**

### 333 **Reagents**

334 pCMV3 and pCMV3 PD-1 plasmids were from Sinobiological (Wayne, PA, USA), pCEFL and  
335 pCEFL AU5-tagged Ras (V12) plasmids were a kind gift of J.S. Gutkind (*De Falco et al., 2007*).  
336 PD-1 was cloned in pFLAG 5A (Invitrogen, Carlsbad, CA, USA). Soluble PD-L1 (sPD-L1) was  
337 from R&D systems (Minneapolis, MN, USA), Nivolumab was kindly provided by S. Scala. Anti-  
338 Ras antibody for immunoprecipitation (clone MA1012) was from Invitrogen. Anti-phospho Y32,  
339 anti-phospho Y64 Ras antibodies and Y32 and Y64 peptides, used to saturate aspecific binding of  
340 each antibody, were provided by M. Ohh. SHP099, Vemurafenib, and Selumetinib were from  
341 Selleckchem (Houston, TX, USA). IgG<sub>4</sub> control antibodies were from Invitrogen.

342

### 343 **Cell culture and transfection**

344 Human thyroid cancer cell lines BcPAP, TPC-1, 8505c, CAL62, SW1736, FRO, BHT101, HTH7  
345 and OCUT1 were obtained and maintained as previously described (*Liotti et al., 2017*). The normal  
346 thyroid cells H-6040, isolated from normal human thyroid tissue and cultured in Human Epithelial  
347 Cell Medium with the addition of Insulin-Transferrin-Selenium, EGF, Hydrocortisone, L-  
348 Glutamine, antibiotic-antimycotic solution, Epithelial Cell supplement, and FBS were purchased  
349 from Cell Biologics (Chicago, IL, USA). H-6040 cells were used at passages between 3 and 6.

350 Transient transfections of TC cells were performed using polyethylenimine according to  
351 manufacturer's instructions (Merck, Darmstadt, Germany). Cells were harvested 48 hrs after  
352 transfection. Electroporation was used (Neon® Transfection System for Electroporation, Life  
353 Technologies, Carlsbad, CA, USA) to obtain stably transfected cells (*Prevete et al., 2017*).

354 For RNA interference, we used SMART pools of siRNA from Dharmacon (Lafayette, CO,  
355 USA) targeting PD-1 or SHP2. Transfection was carried out by using 100 nM of SMARTpool and 6  
356 µl of DharmaFECT (Dharmacon) for 48 h (*Prevete et al., 2015*).

357

358 **Cytofluorimetric analysis**

359 Cells were incubated (30 min at 4°C) with specific or isotype control antibodies. Cells were  
360 analysed with a FACS Calibur cytofluorimeter using CellQuest software (BD Biosciences,  
361 Mississauga, ON, Canada). 10<sup>4</sup> events for each sample were acquired (*Prevete et al., 2015*). Anti-  
362 PD-1 and anti-PD-L1 antibodies were from ebioscience (Thermo Fisher, Waltham, MA, USA),  
363 anti-PD-L2 from Miltenyi Biotec (Bergisch Gladbach, Germany).

364

365 **Immunohistochemistry**

366 Thyroid carcinomas were selected from the Pathology Unit of the University of Perugia upon  
367 informed consent; the protocol for the study was approved by the institutional committee of  
368 University of Perugia. Thyroid tissues were formalin fixed and paraffin embedded (FFPE). Sections  
369 of 4 µm were obtained. BOND-III fully automated immunohistochemistry stainer (Leica  
370 Biosystems, Wetzlar, Germany) carried out the immunostaining, using heat-induced antigen  
371 retrieval at pH 9.0 for 20 minutes, followed by primary antibody (PD-1, clone EH33; dilution  
372 1:200) (Cell Signaling, Beverly, MA, USA) incubation for 15 minutes. Finally, the ready to use  
373 Bond™ Polymer Refine Detection System allowed the detection of antigen-antibody reaction  
374 (*Giannini et al., 2019*). We used a cut-off of 5% to determine the positivity of  
375 immunohistochemistry: cases showing immunostaining in more than 5% of neoplastic cells were  
376 considered positive, regardless of the intensity of the staining.

377

378 **S-phase entry**

379 S-phase entry was evaluated by Bromodeoxyuridine (BrdU) incorporation. Cells were serum-  
380 deprived and treated with stimuli for 24 h. BrdU was added at a concentration of 10 µM for the last  
381 1 h. BrdU-positive cells were revealed with Texas Red conjugated secondary Abs (Jackson  
382 Laboratories, West Grove, PA, USA). Fluorescence was detected by FACS analysis (*Liotti et al.,*  
383 *2017*).

384

### 385 **Migration assays**

386 Chemotaxis was evaluated using a Boyden chamber. We used a 48-well microchemotaxis chamber  
387 (NeuroProbe, Gaithersburg, MD, USA) and 8- $\mu$ m-pore polycarbonate membranes (Nucleopore,  
388 Pleasanton, CA, USA) coated with 10  $\mu$ g/ml fibronectin (Merck) as described elsewhere (*Prevete et*  
389 *al., 2015*).

390

### 391 **Protein studies**

392 Protein extraction and immunoblotting experiments were performed according to standard  
393 procedures (*Collina et al., 2019*). Antibodies to PD-1, phospho-PD-1, phospho-BRAF, phospho-  
394 MEK1/2, phospho-MAPK (p44/p42), Ras, phospho-SHP2, SHP2, and GRB2 for Western blot  
395 analysis were obtained from Cell Signaling Technology (Danvers, MA, USA). Monoclonal anti-  
396 tubulin antibody was from Sigma Aldrich. Secondary anti-mouse and anti-rabbit antibodies were  
397 coupled to horseradish peroxidase (Biorad, Hercules, CA, USA).

398 Cell lysates were subjected to immunoprecipitation with different antibodies or subjected to  
399 pull-down binding assays with purified recombinant proteins immobilized on agarose beads. The  
400 glutathione-S-transferases (GST) fusion proteins were expressed in *Escherichia coli* and purified  
401 with glutathione-conjugated agarose beads (Merck) by standard procedures. The protein complexes  
402 were eluted and resolved by sodium dodecyl sulphate-polyacrylamide gel electrophoresis (SDS-  
403 PAGE). Immunoblotting with specific antibodies and enhanced chemiluminescence (ECL; Thermo  
404 Fisher) were employed for immune-detection of proteins in complexes (*Avilla et al., 2011*).

405 Cell fractionation experiments were performed using the Subcellular Protein Fractionation  
406 Kit for Cultured Cells according to manufacturer's instructions (Thermo Fisher). Membrane  
407 fraction's protein content was normalized by using anti-transferrin receptor antibody (Invitrogen).

408

### 409 **Immunofluorescence**

410 Cells, grown on coverslips, were washed with phosphate-buffered saline (PBS), fixed with 4%  
411 paraformaldehyde (PFA) and quenched with 50 mM NH<sub>4</sub>Cl. Then, cells were permeabilized with  
412 0.2% Triton X-100 for 5 min and blocked for 30 min in PBS containing 5% FBS and 0.5% bovine  
413 serum albumin (BSA). Primary antibodies were detected with Alexa Fluor546-conjugated  
414 secondary antibodies (Abcam, Cambridge, UK). Images were acquired using a laser scanning  
415 confocal microscope (LSM 510; Carl Zeiss MicroImaging, Inc, Oberkochen, Germania.) equipped  
416 with a planapo 63X oil-immersion (NA 1.4) objective lens by using the appropriate laser lines and  
417 setting the confocal pinhole to one Airy unit. Z-slices from the top to the bottom of the cell by using  
418 the same setting (laser power, detector gain) were collected as previously described (*Paladino et al.*,  
419 2008).

420

#### 421 **SHP2 activity assay**

422 SHP2 phosphatase activity was determined using the human/mouse/rat active DuoSet IC kit (R&D  
423 Systems). Briefly, cellular SHP2 bound to anti-SHP2 antibody conjugated to agarose beads was  
424 exposed to synthetic phosphopeptide substrate, which is only dephosphorylated by active SHP2 t.  
425 The amount of free phosphate generated in the supernatant was determined, as absorbance at 620  
426 nm, by a sensitive dye-binding assay using malachite green and molybdic acid and represents a  
427 direct measurement of SHP2 activity in the cellular system (*Bunda et al.*, 2015).

428

#### 429 **Tumorigenicity in immunocompromised mice**

430 Each group of 8 mice (6-week-old CD1 nu/nu females) was inoculated subcutaneously with 8505c  
431 parental cells, 8505c transfected with pCMV3 or pCMV3 PD-1 cells ( $1 \times 10^7$  cells/mouse, two  
432 clones) (*Liotti et al.*, 2017). Nivolumab (anti-PD-1) or control IgG<sub>4</sub> were intraperitoneally (i.p.)  
433 administered at 30 mg/kg twice per week. The experimental protocol for animal studies was  
434 approved by the Ministero Italiano della Salute (No. 317/2019-PR). For xenograft histological

435 analysis, anti-Ki-67 was from Biocare Medical (Pacheco, CA, USA), anti-CD31, anti-cleaved  
436 caspase 3 were from R&D Systems.

437

#### 438 **Statistical analysis**

439 The results are expressed as the mean  $\pm$  SEM of at least 3 experiments. Values from groups were  
440 compared using the paired Student *t* test or Duncan test. The association between PD-1 expression  
441 and clinic-pathologic parameters in immunohistochemistry experiments was conducted using  $\chi^2$ . *P*  
442 value  $< 0.05$  was considered statistically significant.

443

444 **Acknowledgements:** We are grateful to Rosaria Catalano and Mariarosaria Montagna for technical  
445 help, and Massimiliano Cacace for animal handling

446

447 **Financial supports:**

448 Associazione Italiana per la Ricerca sul Cancro (AIRC) IG grant 23218; Istituto Superiore di

449 Oncologia grant (MIUR PON01\_02782/12); POR Campania FESR 2014-2020 "SATIN" grant;

450 POR Campania FESR 2014-2020 "RARE.PLAT.NET" grant; and "POR Campania FESR 2014-

451 2020 "grant

452

453 **Competing interests**

454 The authors declare no conflict of interest

455 **References**

- 456 Avilla, E., et al.2011. Activation of TYRO3/AXL tyrosine kinase receptors in thyroid cancer.  
457 *Cancer research* **71**:1792-1804. doi:10.1158/0008-5472.CAN-10-2186.
- 458 Ball, D. W., et al.2007. Selective growth inhibition in BRAF mutant thyroid cancer by the mitogen-  
459 activated protein kinase kinase 1/2 inhibitor AZD6244. *The Journal of clinical endocrinology and*  
460 *metabolism* **92**:4712-4718. doi:10.1210/jc.2007-1184.
- 461 Bastman, J. J., et al.2016. Tumor-Infiltrating T Cells and the PD-1 Checkpoint Pathway in  
462 Advanced Differentiated and Anaplastic Thyroid Cancer. *The Journal of clinical endocrinology and*  
463 *metabolism* **101**:2863-2873. doi:10.1210/jc.2015-4227.
- 464 Boutros, C., et al.2016. Safety profiles of anti-CTLA-4 and anti-PD-1 antibodies alone and in  
465 combination. *Nature reviews. Clinical oncology* **13**:473-486. doi:10.1038/nrclinonc.2016.58.
- 466 Bunda, S., et al.2015. Inhibition of SHP2-mediated dephosphorylation of Ras suppresses  
467 oncogenesis. *Nature communications* **6**:8859. doi:10.1038/ncomms9859.
- 468 Cabanillas, M. E., et al.2018. Neoadjuvant BRAF- and Immune-Directed Therapy for Anaplastic  
469 Thyroid Carcinoma. *Thyroid : official journal of the American Thyroid Association* **28**:945-951.  
470 doi:10.1089/thy.2018.0060.
- 471 Chen, Y. N., et al.2016. Allosteric inhibition of SHP2 phosphatase inhibits cancers driven by  
472 receptor tyrosine kinases. *Nature* **535**:148-152. doi:10.1038/nature18621.
- 473 Collina, F., et al.2019. AXL Is a Novel Predictive Factor and Therapeutic Target for Radioactive  
474 Iodine Refractory Thyroid Cancer. *Cancers* **11** doi:10.3390/cancers11060785.
- 475 Contardi, E., et al.2005. CTLA-4 is constitutively expressed on tumor cells and can trigger  
476 apoptosis upon ligand interaction. *International journal of cancer* **117**:538-550.  
477 doi:10.1002/ijc.21155.
- 478 Cunha, L. L., et al.2013. Differentiated thyroid carcinomas may elude the immune system by B7H1  
479 upregulation. *Endocrine-related cancer* **20**:103-110. doi:10.1530/ERC-12-0313.

- 480 Cunha, L. L., et al.2013. Differentiated thyroid carcinomas and their B7H1 shield. *Future oncology*  
481 **9**:1417-1419. doi:10.2217/fon.13.89.
- 482 Cunha, L. L., et al.2012. Infiltration of a mixture of immune cells may be related to good prognosis  
483 in patients with differentiated thyroid carcinoma. *Clinical endocrinology* **77**:918-925.  
484 doi:10.1111/j.1365-2265.2012.04482.x.
- 485 De Falco, V., et al.2007. RET/papillary thyroid carcinoma oncogenic signaling through the Rap1  
486 small GTPase. *Cancer research* **67**:381-390. doi:10.1158/0008-5472.CAN-06-0981.
- 487 Du, S., et al.2018. Blockade of Tumor-Expressed PD-1 promotes lung cancer growth.  
488 *Oncoimmunology* **7**:e1408747. doi:10.1080/2162402X.2017.1408747.
- 489 French, J. D., et al.2012. Programmed death-1+ T cells and regulatory T cells are enriched in  
490 tumor-involved lymph nodes and associated with aggressive features in papillary thyroid cancer.  
491 *The Journal of clinical endocrinology and metabolism* **97**:E934-943. doi:10.1210/jc.2011-3428.
- 492 Giannini, R., et al.2019. Immune Profiling of Thyroid Carcinomas Suggests the Existence of Two  
493 Major Phenotypes: An ATC-Like and a PDTC-Like. *The Journal of clinical endocrinology and*  
494 *metabolism* **104**:3557-3575. doi:10.1210/jc.2018-01167.
- 495 Hu, Z. Q., et al.2015. Expression and clinical significance of tyrosine phosphatase SHP2 in thyroid  
496 carcinoma. *Oncology letters* **10**:1507-1512. doi:10.3892/ol.2015.3479.
- 497 Iyer, P. C., et al.2018. Salvage pembrolizumab added to kinase inhibitor therapy for the treatment of  
498 anaplastic thyroid carcinoma. *Journal for immunotherapy of cancer* **6**:68. doi:10.1186/s40425-018-  
499 0378-y.
- 500 Kano, Y., et al.2016. New structural and functional insight into the regulation of Ras. *Seminars in*  
501 *cell & developmental biology* **58**:70-78. doi:10.1016/j.semcd.2016.06.006.
- 502 Kleffel, S., et al.2015. Melanoma Cell-Intrinsic PD-1 Receptor Functions Promote Tumor Growth.  
503 *Cell* **162**:1242-1256. doi:10.1016/j.cell.2015.08.052.



504 Knauf, J. A. and J. A. Fagin.2009. Role of MAPK pathway oncoproteins in thyroid cancer  
505 pathogenesis and as drug targets. *Current opinion in cell biology* **21**:296-303.  
506 doi:10.1016/j.ceb.2009.01.013.

507 Li, H., et al.2017. Programmed cell death-1 (PD-1) checkpoint blockade in combination with a  
508 mammalian target of rapamycin inhibitor restrains hepatocellular carcinoma growth induced by  
509 hepatoma cell-intrinsic PD-1. *Hepatology* **66**:1920-1933. doi:10.1002/hep.29360.

510 Liotti, F., et al.2017. Interleukin-8, but not the Related Chemokine CXCL1, Sustains an Autocrine  
511 Circuit Necessary for the Properties and Functions of Thyroid Cancer Stem Cells. *Stem cells*  
512 **35**:135-146. doi:10.1002/stem.2492.

513 Liotti, F., et al.2017. Multiple anti-tumor effects of Reparixin on thyroid cancer. *Oncotarget*  
514 **8**:35946-35961. doi:10.18632/oncotarget.16412.

515 Liotti, F., et al.2019. Recent advances in understanding immune phenotypes of thyroid carcinomas:  
516 prognostication and emerging therapies. *F1000Research* **8** doi:10.12688/f1000research.16677.1.

517 Malfitano, A. M., et al.2019. Virotherapy as a Potential Therapeutic Approach for the Treatment of  
518 Aggressive Thyroid Cancer. *Cancers* **11** doi:10.3390/cancers11101532.

519 Matozaki, T., et al.2009. Protein tyrosine phosphatase SHP-2: a proto-oncogene product that  
520 promotes Ras activation. *Cancer science* **100**:1786-1793. doi:10.1111/j.1349-7006.2009.01257.x.

521 McNutt, M.2013. Cancer immunotherapy. *Science* **342**:1417. doi:10.1126/science.1249481.

522 Naoum, G. E., et al.2018. Novel targeted therapies and immunotherapy for advanced thyroid  
523 cancers. *Molecular cancer* **17**:51. doi:10.1186/s12943-018-0786-0.

524 Nikiforov, Y. E.2008. Thyroid carcinoma: molecular pathways and therapeutic targets. *Modern*  
525 *pathology : an official journal of the United States and Canadian Academy of Pathology, Inc* **21**  
526 **Suppl 2**:S37-43. doi:10.1038/modpathol.2008.10.

527 Paladino, S., et al.2008. Different GPI-attachment signals affect the oligomerisation of GPI-  
528 anchored proteins and their apical sorting. *Journal of cell science* **121**:4001-4007.  
529 doi:10.1242/jcs.036038.

530 Passariello, M., et al.2020. Ipilimumab and Its Derived EGFR Aptamer-Based Conjugate Induce  
531 Efficient NK Cell Activation against Cancer Cells. *Cancers* **12** doi:10.3390/cancers12020331.  
532 Prevede, N., et al.2017. Formyl peptide receptor 1 suppresses gastric cancer angiogenesis and  
533 growth by exploiting inflammation resolution pathways. *Oncoimmunology* **6**:e1293213.  
534 doi:10.1080/2162402X.2017.1293213.  
535 Prevede, N., et al.2015. The formyl peptide receptor 1 exerts a tumor suppressor function in human  
536 gastric cancer by inhibiting angiogenesis. *Oncogene* **34**:3826-3838. doi:10.1038/onc.2014.309.  
537 Rabinovich, G. A., et al.2007. Immunosuppressive strategies that are mediated by tumor cells.  
538 *Annual review of immunology* **25**:267-296. doi:10.1146/annurev.immunol.25.022106.141609.  
539 Ran, H., et al.2016. Sticking It to Cancer with Molecular Glue for SHP2. *Cancer cell* **30**:194-196.  
540 doi:10.1016/j.ccell.2016.07.010.  
541 Rota, G., et al.2018. Shp-2 Is Dispensable for Establishing T Cell Exhaustion and for PD-1  
542 Signaling In Vivo. *Cell reports* **23**:39-49. doi:10.1016/j.celrep.2018.03.026.  
543 Saini, S., et al.2018. Therapeutic advances in anaplastic thyroid cancer: a current perspective.  
544 *Molecular cancer* **17**:154. doi:10.1186/s12943-018-0903-0.  
545 Scott, L. M., et al.2011. Shp2 protein tyrosine phosphatase inhibitor activity of estramustine  
546 phosphate and its triterpenoid analogs. *Bioorganic & medicinal chemistry letters* **21**:730-733.  
547 doi:10.1016/j.bmcl.2010.11.117.  
548 Thorsson, V., et al.2018. The Immune Landscape of Cancer. *Immunity* **48**:812-830 e814.  
549 doi:10.1016/j.immuni.2018.03.023.  
550 Ulisse, S., et al.2019. PD-1 Ligand Expression in Epithelial Thyroid Cancers: Potential Clinical  
551 Implications. *International journal of molecular sciences* **20** doi:10.3390/ijms20061405.  
552 Xing, J., et al.2011. The BRAFT1799A mutation confers sensitivity of thyroid cancer cells to the  
553 BRAFV600E inhibitor PLX4032 (RG7204). *Biochemical and biophysical research*  
554 *communications* **404**:958-962. doi:10.1016/j.bbrc.2010.12.088.

- 555 Yang, Y.2015. Cancer immunotherapy: harnessing the immune system to battle cancer. *The Journal*  
556 *of clinical investigation* **125**:3335-3337. doi:10.1172/JCI83871.
- 557 Yao, H., et al.2018. Cancer Cell-Intrinsic PD-1 and Implications in Combinatorial Immunotherapy.  
558 *Frontiers in immunology* **9**:1774. doi:10.3389/fimmu.2018.01774.
- 559 Zhang, J., et al.2015. Functions of Shp2 in cancer. *Journal of cellular and molecular medicine*  
560 **19**:2075-2083. doi:10.1111/jcmm.12618.
- 561 Zhao, Y., et al.2018. Antigen-Presenting Cell-Intrinsic PD-1 Neutralizes PD-L1 in cis to Attenuate  
562 PD-1 Signaling in T Cells. *Cell reports* **24**:379-390 e376. doi:10.1016/j.celrep.2018.06.054.
- 563

564 **Figure Legends**

565

566 **Figure 1 Immune checkpoint expression in thyroid cancer (TC) cells and human TC tissue**

567 **samples.**

568 **A.** Mean Fluorescence Intensity for PD-1, PD-L1 and PD-L2 measured by flow cytometric analysis  
569 on H-6040 normal thyroid epithelial cells, PTC-derived cell lines (BcPAP and TPC-1), and ATC-  
570 derived cell lines (8505c, CAL62, SW1736, FRO, BHT101, HTH7, OCUT1). Data are presented as  
571 mean  $\pm$  SD. **B.** Immunohistochemical staining of representative PTC samples with anti-PD-1  
572 antibody. Examples of negative PD-1 staining (**PTC1**), intense PD-1 staining in the tumour immune  
573 infiltrate (**PTC2**), and PD-1 immunoreactivity in thyroid epithelial cells (**PTC3**) are shown. In  
574 positive samples, immunoreactivity was detected mainly in the cytosolic portion and/or at plasma  
575 membrane of epithelial TC cells.

576

577 **Figure 2 Functional activity of intrinsic PD-1 in TC cells.**

578 **A.** DNA synthesis of 8505c and TPC-1 cells transiently transfected with pFLAG PD-1 or the  
579 relative empty vector (pFLAG), or treated or not with soluble PD-L1 (sPD-L1 – 1  $\mu$ g/ml) assessed  
580 by BrdU incorporation. Data are presented as mean  $\pm$  SD of 5 independent experiments. **B.** DNA  
581 synthesis of 8505c and TPC-1 cells treated with siRNA targeting PD-1 (siPD-1 – 100 nM) or the  
582 relative control (siCTR – 100 nM) for 48 h or with Nivolumab (10  $\mu$ g/ml) or control IgG<sub>4</sub> (10  
583  $\mu$ g/ml) for 24 h assessed by BrdU incorporation. Data are presented as mean  $\pm$  SD of 5 independent  
584 experiments. **C.** Percent of migrated cells over control of stably transfected 8505c PD-1 cells versus  
585 10% FBS, or 8505c cells treated with Nivolumab (10  $\mu$ g/ml) or control IgG<sub>4</sub> (10  $\mu$ g/ml) toward  
586 sPD-L1 (1  $\mu$ g/ml) or medium alone. Data are presented as mean  $\pm$  SD of 5 independent experiments.  
587 \*  $P < 0.05$  compared to the relative untreated cells. §  $P < 0.05$  compared to sPD-L1 alone.

588

589 **Figure 3 Signalling pathways downstream PD-1 activation/overexpression.**

590 **A.** Activation of BRAF, MEK1/2 and MAPK (p44/p42) in 8505c and TPC-1 cells, transfected with  
591 pFLAG PD-1 or the relative empty vector (pFLAG), assessed by western blot for their  
592 phosphorylated forms. **B.** Activation of BRAF, MEK1/2 and MAPK in 8505c and TPC-1 cells,  
593 treated or not with sPD-L1 (1 µg/ml - 30 min), assessed by western blot for their phosphorylated  
594 forms. **C.** Activation of BRAF, MEK1/2 and MAPK in 8505c and TPC-1 cells, treated with siPD1  
595 or siCTR (100 nM - 48 h) or with Nivolumab or IgG<sub>4</sub> (10 µg/ml – 15 and 30 min), assessed by  
596 western blot for their phosphorylated forms. **D.** Pull-down assay with the GST-RAF1-Ras Binding  
597 Domain (RBD) of 8505c and TPC-1 cells transiently transfected with pFLAG + pCEFL, pFLAG  
598 PD-1 + pCEFL, pFLAG + pCEFL H-Ras AU5, or pFLAG PD-1 + pCEFL H-Ras AU5. A  
599 representative pull-down is shown, together with the mean densitometric analysis ± SD of 5  
600 independent assays. \*  $P < 0.05$  compared to the relative control.

601

602 **Figure 4 Effects of intrinsic PD-1 on SHP2 localization and functions.**

603 **A.** Total cell protein extracts from 8505c and TPC-1 cells transiently transfected with pFLAG PD-1  
604 or the empty vector (pFLAG) were subjected to immunoprecipitation followed by western blotting  
605 with the indicated antibodies. **B.** Total protein extracts from 8505c and TPC-1 cells transiently  
606 transfected with pFLAG-PD-1 were subjected to an *in vitro* pull-down assay using the indicated  
607 recombinant proteins. Bound proteins were immunoblotted with antibody against PD-1. **C.** 8505c  
608 cells transiently transfected with PD-1 (pFLAG PD-1) or stably overexpressing PD-1 (pCMV3 PD-  
609 1 cl16) and the relative control cells were harvested and subjected to cell protein fractionation.  
610 Membrane (M) and cytoplasmic (C) protein fractions were immunoblotted with the indicated  
611 antibodies. Transferrin receptor or tubulin levels were used as normalization of membrane and  
612 cytosolic fractions, respectively. **D.** Immunofluorescence microscopy of TPC-1 cells, transiently  
613 transfected with pFLAG PD-1 or the empty vector, stained with an antibody specific for SHP2.

614 Bars, 5  $\mu$ m. **E.** SHP2 phosphatase activity assay on TPC-1 and 8505c cells transiently transfected  
615 with PD-1 (pFLAG PD-1) and the relative control (pFLAG), assessed by using a specific SHP2  
616 phosphorylated substrate in the presence of the Malachite Green tracer, a colorimetric method  
617 (absorbance at 620 nm) for the detection of free inorganic phosphate. The SHP2 phosphatase  
618 activity was normalized for SHP2 content as assessed by western blot. Data are presented as mean  $\pm$   
619 SD of 3 independent experiments. **F.** Total cell protein extracts from 8505c cells transiently  
620 transfected with pCEFL H-Ras AU5 + pFLAG PD-1 or empty vector (pFLAG) were subjected to  
621 immunoprecipitation followed by western blotting with the indicated antibodies. A representative  
622 experiment is shown, together with the mean densitometric analysis  $\pm$  SD of 5 independent assays.  
623 \*  $P < 0.05$  compared to the relative control.

624

625 **Figure 5 Dependence of PD-1 biologic activities on SHP2/BRAF/MEK cascade.**

626 **A.** Effects of siRNA targeting SHP2 (siSHP2 - 100 nM) or the relative control on SHP2 protein  
627 expression levels assessed by western blot in 8505c cells stably transfected with PD-1 or the empty  
628 vector (one representative clone is shown). **B.** DNA synthesis of stably transfected 8505c pCMV3  
629 PD-1 cells (mean of 3 clones) compared to empty vector transfected cells treated with siSHP2 or  
630 siCTR assessed by BrdU incorporation. Data are presented as mean  $\pm$  SD of 5 independent  
631 experiments. **C.** DNA synthesis of 8505c cells stably transfected with PD-1 (pCMV3 PD-1  
632 compared to pCMV3) and treated for 18 h with SHP099 (350 nM) assessed by BrdU incorporation.  
633 The mean of three clones is shown for each condition. Data are presented as mean  $\pm$  SD of 5  
634 independent experiments. **D.** DNA synthesis of stably transfected 8505c pCMV3 PD-1 cells (3  
635 clones) compared to empty vector transfected cells treated for 18 h with Vemurafenib (Vemu - 10  
636  $\mu$ M) or Selumetinib (Selu - 10  $\mu$ M) assessed by BrdU incorporation. Data are presented as mean  $\pm$   
637 SD of 5 independent experiments. **E.** Percent of migrated 8505c cells over control toward sPD-L1  
638 (1  $\mu$ g/ml) or medium alone (10% FBS) following treatment with SHP099 (350 nM), Vemurafenib

639 (Vemu - 10  $\mu$ M) or Selumetinib (Selu - 10  $\mu$ M). Data are presented as mean  $\pm$  SD of 5 independent  
640 experiments. \*  $P < 0.05$  compared to the relative control. §  $P < 0.05$  compared to NT or siCTR.

641

642 **Figure 6 Role of intrinsic PD-1 in tumorigenicity of TC cells.**

643 **A.** Tumour growth of pCMV3- (a mass population) or PD-1-transfected (mean of 2 clones) 8505c  
644 cells. **B.** Proliferation index (Ki-67), apoptotic rate (cleaved caspase 3), and vessel density (CD31)  
645 assessed by immunohistochemistry of 8505c pCMV3 or pCMV3 PD-1 cell xenografts harvested 28  
646 days post-inoculation. The relative quantifications (5 fields/sample) are shown. **C.** Tumour growth  
647 of 8505c xenografts in mice treated intraperitoneally (i.p.) at 30  $\square$  mg/kg twice per week with  
648 Nivolumab (Nivo) or control IgG<sub>4</sub>. **D.** Proliferation index (Ki-67), apoptotic rate (cleaved caspase  
649 3), and vessel density (CD31) assessed by immunohistochemistry of 8505c cell xenografts  
650 harvested 35 days post-inoculation. Representative images and the relative quantifications (5  
651 fields/sample) are shown.\*  $P < 0.05$  compared to the relative control.

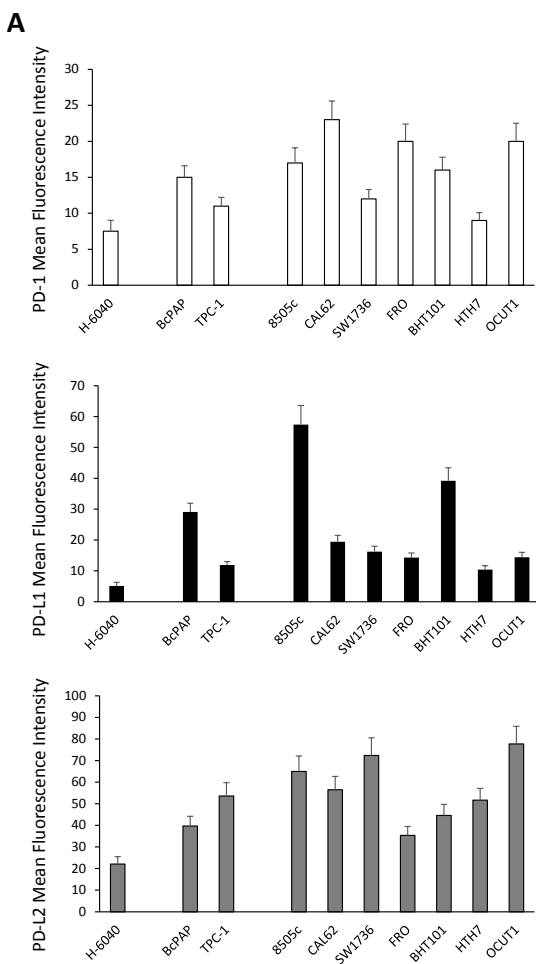

Figure 1

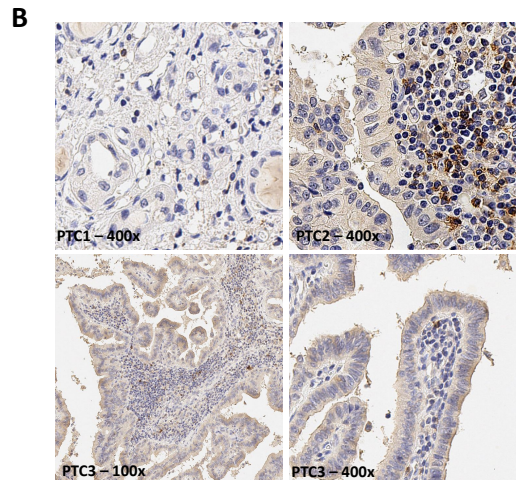



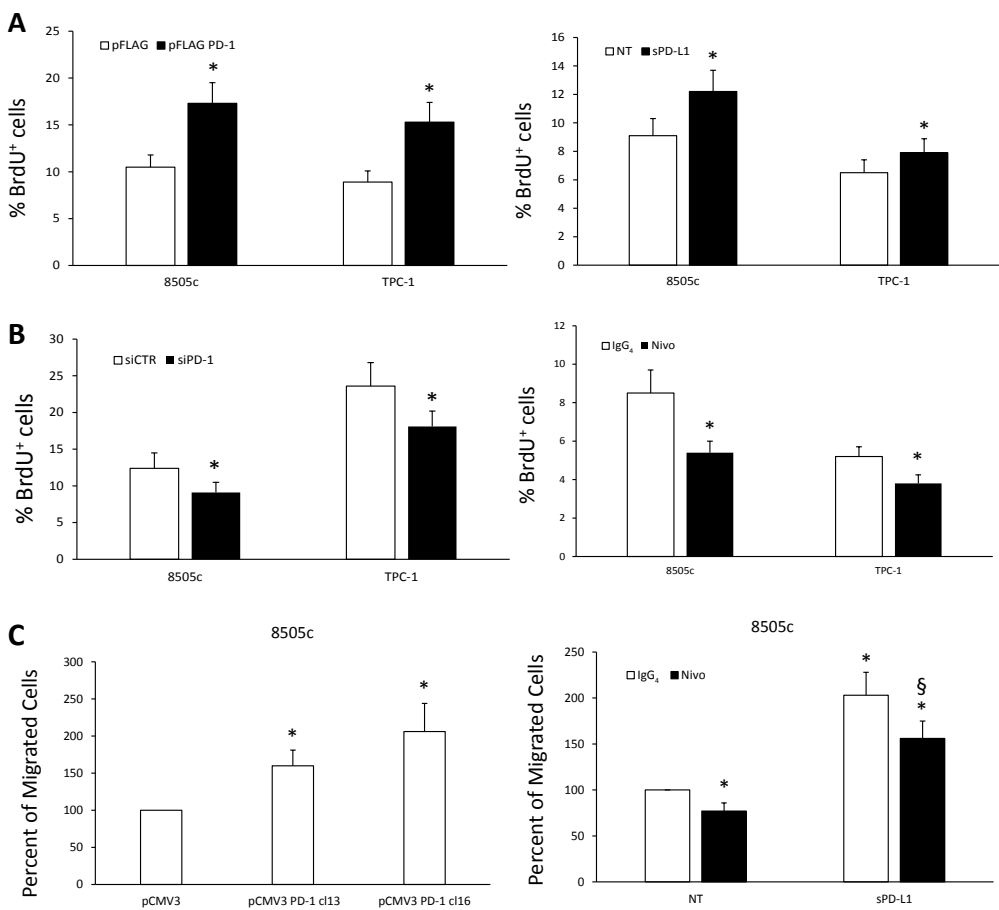

Figure 2

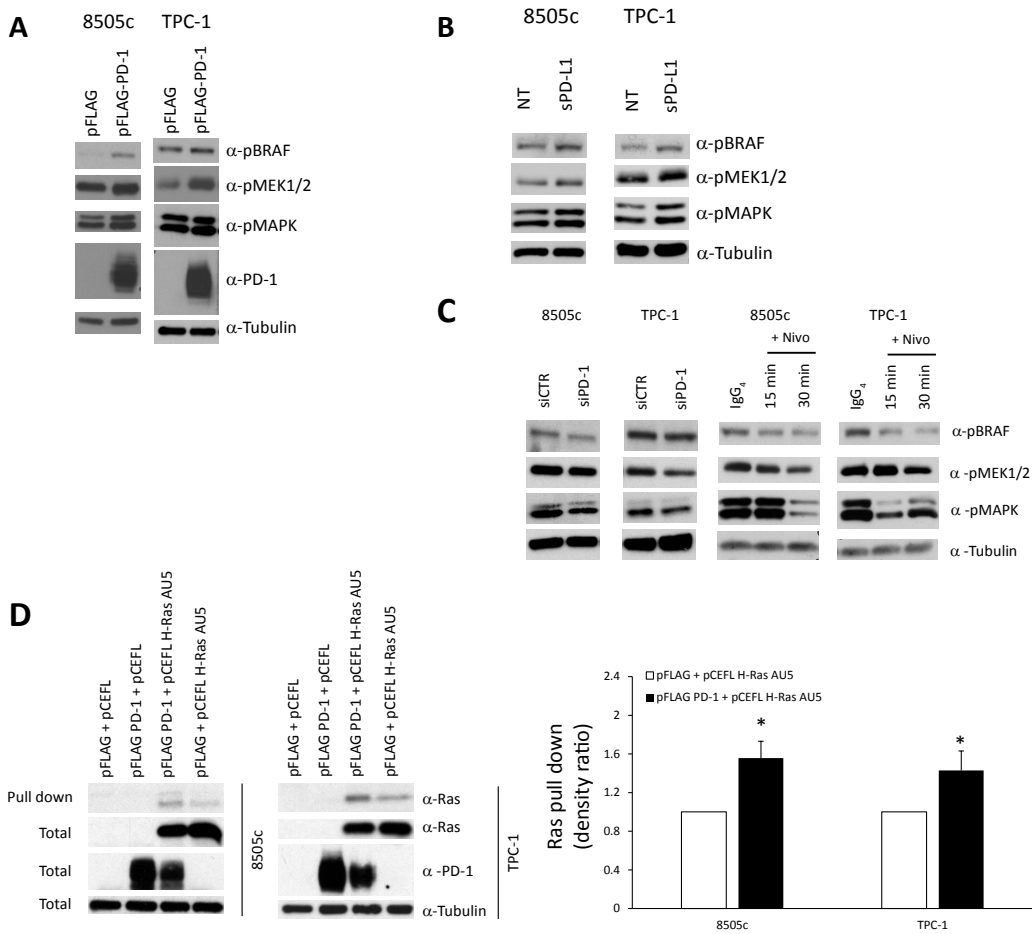

Figure 3

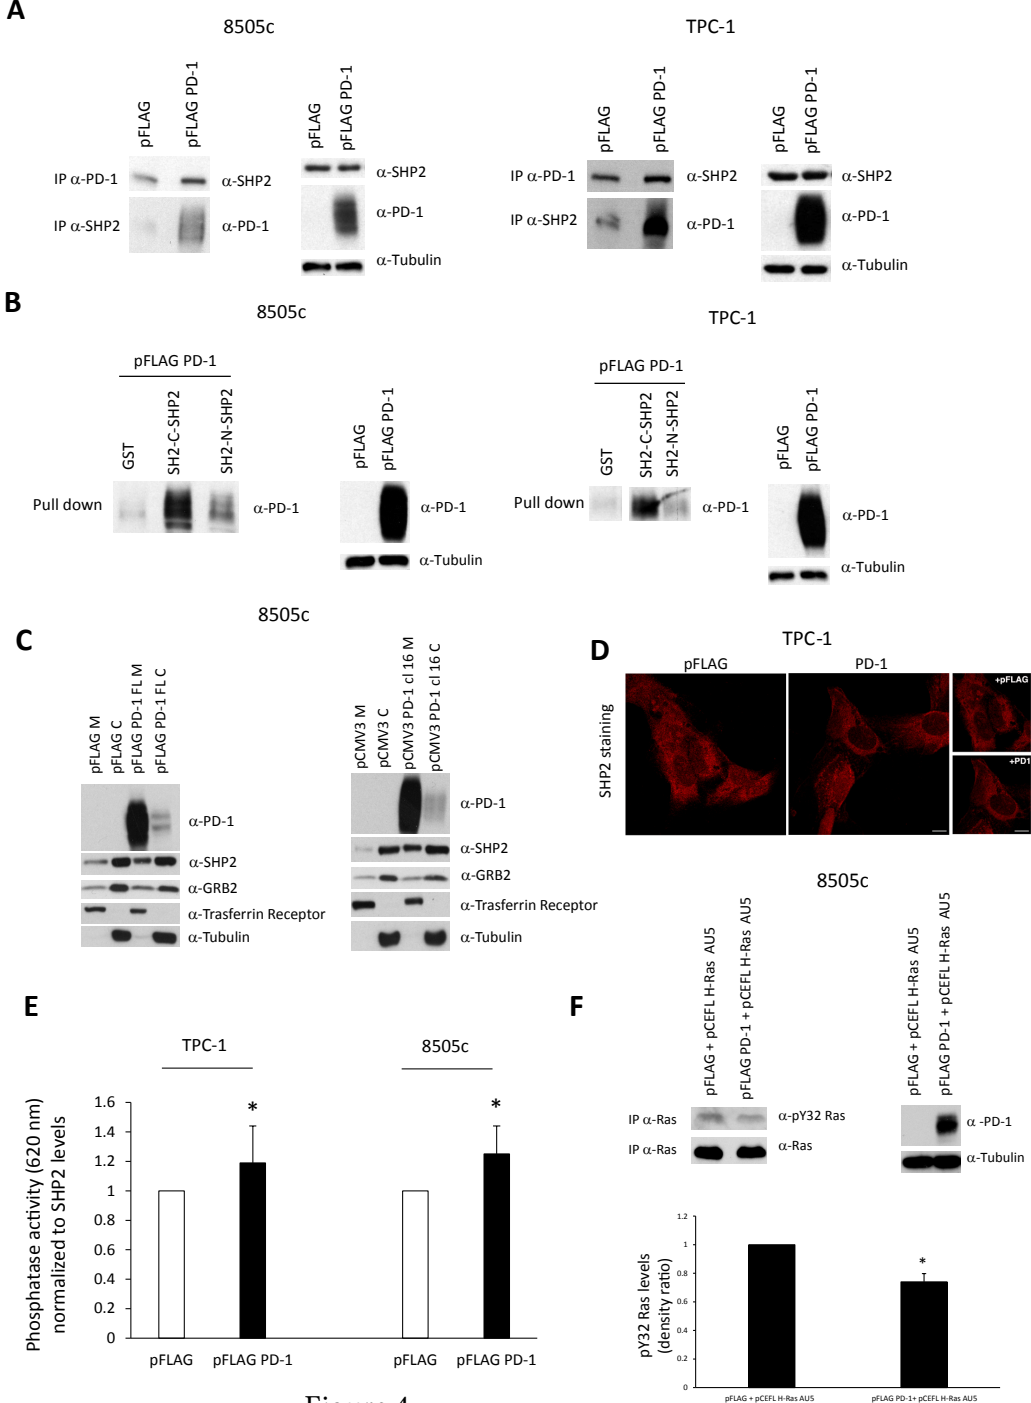

Figure 4

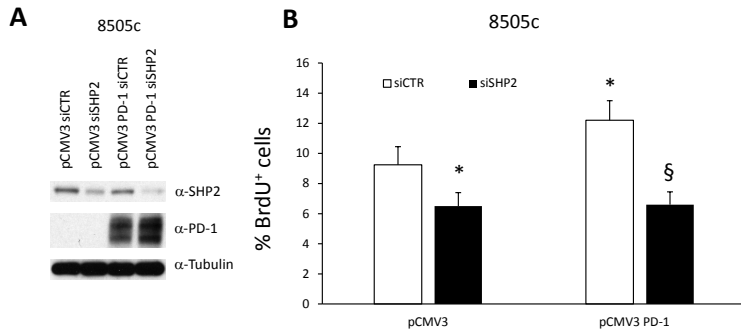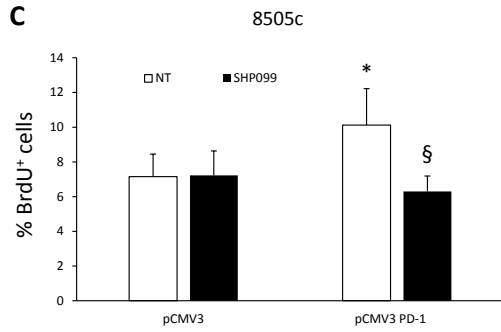

Figure 5

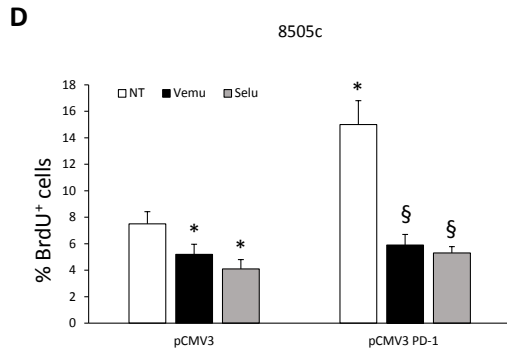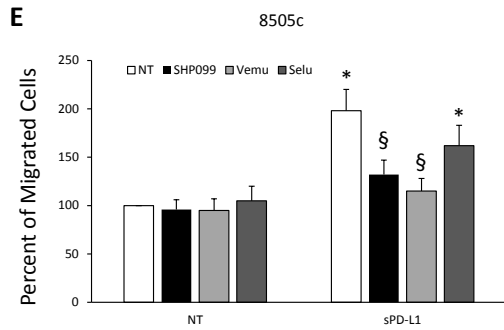

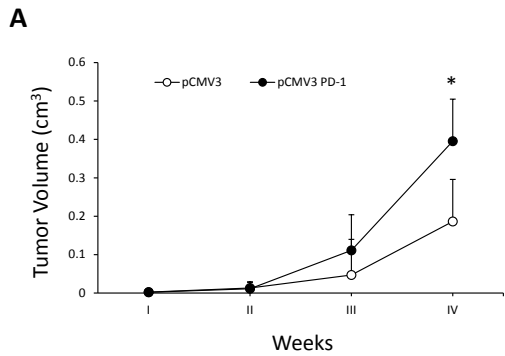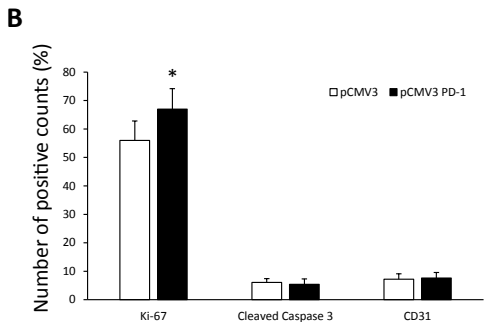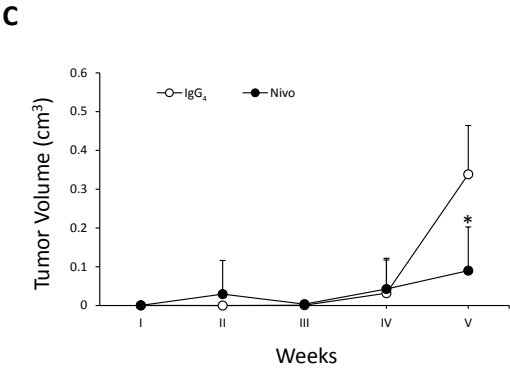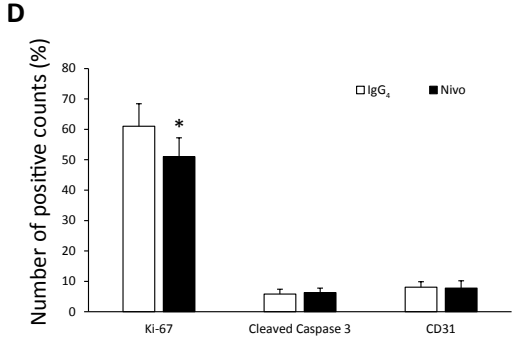

Figure 6

|                                         | <b>Epithelial cell PD-1 staining</b> |                 | <b>P</b>     |
|-----------------------------------------|--------------------------------------|-----------------|--------------|
|                                         | <b>Negative/low</b>                  | <b>Positive</b> |              |
| <b>BRAF (n=34)</b>                      |                                      |                 |              |
| not mutated                             | 2                                    | 2               | 0.9          |
| mutated                                 | 16                                   | 14              |              |
| <b>Thyroiditis (n=33)</b>               |                                      |                 |              |
| No                                      | 12                                   | 11              | 0.9          |
| Yes                                     | 5                                    | 5               |              |
| <b>TNM (n=34)</b>                       |                                      |                 |              |
| T1                                      | 11                                   | 9               | 0.77         |
| T2                                      | 4                                    | 3               |              |
| T3                                      | 3                                    | 4               |              |
| N0                                      | 17                                   | 6               | <b>0.04*</b> |
| N1                                      | 1                                    | 10              |              |
| M0                                      | 11                                   | 15              | 0.9          |
| M1                                      | 7                                    | 1               |              |
| <b>Progression free survival (n=28)</b> |                                      |                 |              |
| No                                      | 3                                    | 4               | 0.51         |
| Yes                                     | 12                                   | 9               |              |
| <b>Stage (n=29)</b>                     |                                      |                 |              |
| 1                                       | 12                                   | 6               | <b>0.04*</b> |
| 2                                       | 0                                    | 0               |              |
| 3                                       | 1                                    | 5               |              |
| 4                                       | 2                                    | 3               |              |
| <b>Infiltrative phenotype (n=34)</b>    |                                      |                 |              |
| No                                      | 15                                   | 13              | 0.87         |
| Yes                                     | 3                                    | 3               |              |

**Table 1.** Relation between PD-1 epithelial TC cell expression and clinic-pathological features. \* P< 0.05 among groups
